# Supplementary material for: Preliminary assessment of pre‐morbid DNA methylation in individuals at high genetic risk of mood disorders
Source: PubMed Central journal article supplement (PMC5006843; doi:10.1111/bdi.12415), 2016-07-21
Supplement: BDI-18-410-s002.pdf [file BDI-18-410-s002.pdf]

cg07398767  
(CA10)

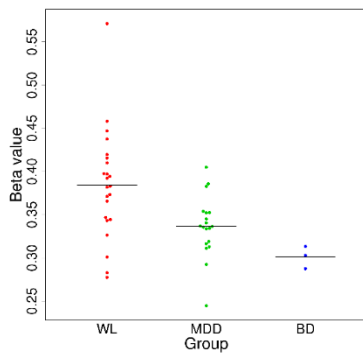

cg08292919  
(GABBR1)

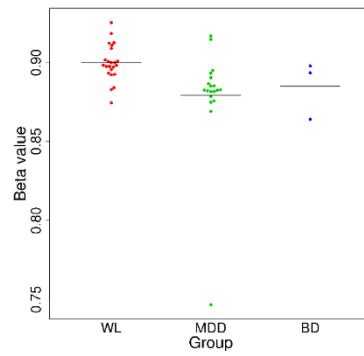

cg18995182  
(COL4A5/6)

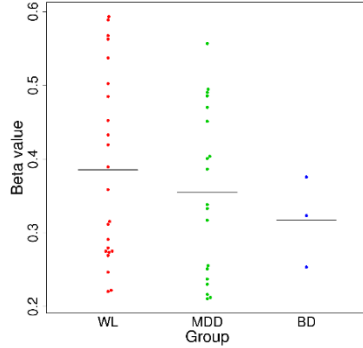

cg19006127  
(N/A)

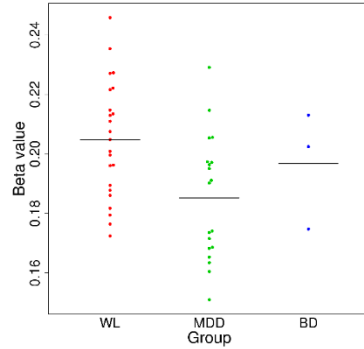

cg08608800  
(ZC3H13)

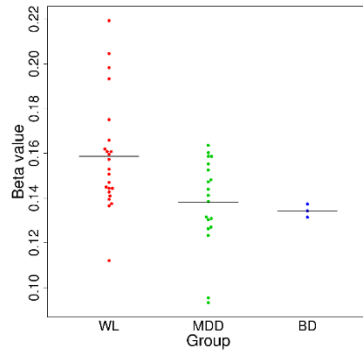

cg19199483  
(N/A)

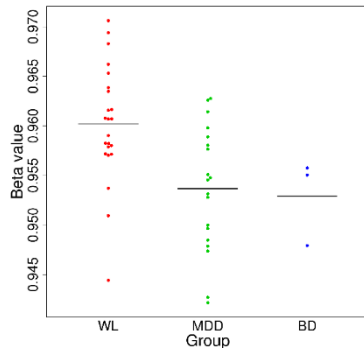

cg01642827  
(GET4)

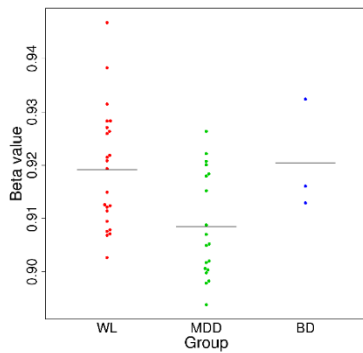

cg03773183  
(N/A)

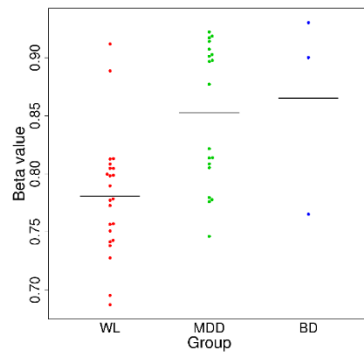

cg01724150  
(NMNAT3)

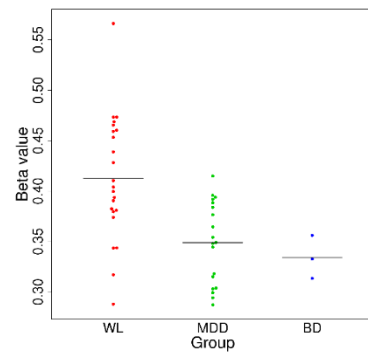

cg26893134  
(FRK)

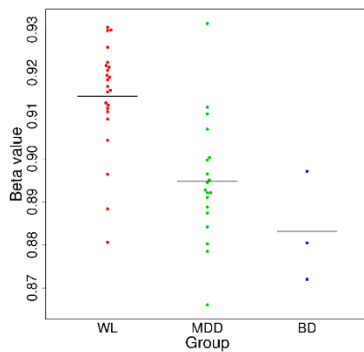

**Supplementary Figure 2.** Beeswarm plots showing methylation beta-values for the top ten differentially methylated loci (ranked by uncorrected  $p$ -value) identified when comparing high-risk individuals who remained well (WL) to those who developed either bipolar disorder (BD) or major depressive disorder (MDD). For illustration purposes, beta-values are plotted separately according to future diagnosis; all analyses were, however, carried out using a combined “ill later (MDD and BD)” group.
